# Supplementary material for: First record of Peropteryx leucoptera (Chiroptera, Emballonuridae) for the Caatinga of Northeastern Brazil and additional records for the Amazon and Atlantic Rainforest
Source: publisher site journal article supplement (doi:10.1515/mammalia-2023-0099), 2024-03-18
Supplement: Supplementary file 2 [file j_mammalia-2023-0099_suppl_001.docx]

**Supplementary Material**

**First record of *Peropteryx leucoptera* (Chiroptera, Emballonuridae) for the Caatinga of Northeastern Brazil and additional records for the Amazon and Atlantic Rainforest**

Cynthia Salzgeber et al.

DOI 10.1515/mammalia-2023-0099

**Supplementary Material S1:** Examined material.

*Peropteryx leucoptera* – **Brazil**: *Amapá:* APA Rio Curiaú, Macapá (IEPA 1258♂); *Amazonas*: Estação Experimental de Silvicultura Tropical INPA, SUFRAMA, Manaus (ZUEC 0757♂), Nova Olinda do Norte (UFMG 3546♂), Rio Eiru, Santo Antônio (FMNH 140789♀); *Bahia:* Vila de Patumé, Curaçá (CMARF 000320♀, 000321♀), Rio Branco, Fazenda Bela Vista, Ilhéus (MZUSP 11613♀, 11614♂, 11615♀); *Pará:* Caxiricatuba, Rio Tapajós, Aveiro (AMNH 94492♂, 94493♂, 94495♀, 94496♀), Belém (MZUSP 11536♂, 11537♂), Ilha do Taiuna, Rio Tocantins, Cametá ( AMNH 97069♂, 97070♂, 97071♀, 97072♀, 97073♀, 97240♀), Cachoeira do Arari, Marajó (MZUSP 6001♂), Igarapé Brabo, Rio Tapajós (AMNH 94500♂, 94502♀), Porto Trombetas, Platô Bacaba, Oriximiná (VCT 1259♀, VCT 1323♀), Villarinho do Monte, Rio Xingu, Porto de Moz (AMNH 96122♀), Vila Jatuarana, Prainha (IEPA 1942♂), Aramanaí, Rio Tapajós, Santarém (AMNH 94473♂, 94474♀), Tamary, Rio Tapajós, Santarém (AMNH 94481♂, 94482♂, 94483♀, 94484♀, 94485♂, 94486♀, 94489♀, 94490♀); *Paraíba:* Comunidade Caiana, Mamanguape (UFPB 8932♂), REBIO Guaribas, SEMA 3, Rio Tinto (UFPB 7312♂), RPPN Fazenda Pacatuba, Sapé (UFPB 1293♀, 1307♂, 1308♂, 1309♂, 8165♀, 10717♀); *Pernambuco:* Refúgio Ecológico Charles Darwin, Igarassu (UFPE 1338, 1339), Engenho Vicente Campelo, Usina Cucaú, Ribeirão (UFPB 7468♂), Mata do Camocim, EECO do Tapacurá, São Lourenço da Mata (UFPE 1192♀); *Rio Grande do Norte:* Parque Nacional da Furna Feia, Mossoró (UFMG 4716♀); *Rondônia:*UHE Jirau, Mutum-Paraná, Porto Velho (MZUSP 35753♀, MZUSP 35754♀) ; **French Guiana:***Cayenne:* Paracou, Sinnamary (AMNH 266011♀, 267087♀); **Guyana:** *Demerara-Mahaica:* Ceiba Biological Station (ROM 112531♂, 113611♀, 113612♂); *Potaro-Siparuni:* Iwokrama Reserve, Kurupukari Base Camp (ROM 107458♂); *Upper Takutu-Upper Essequibo:* Illiwa River (ROM 41530♂); **Peru:** *Loreto:* Matses Indian, Nuevo San Juan, Gálvez River (AMNH 273197♂); **Venezuela:** *Amazonas:* Rio Casiquiare, Buena Vista, Rio Negro (AMNH 78419♀)

**Supplementary Material S2**

**Table 2:** New locality records for *Peropteryx leucoptera* in Brazil. “ND”: Specimens without voucher numbers; “This study”: examined specimens in this study.

| ID | Locality | Latitude | Longitude | Voucher | Source |
| --- | --- | --- | --- | --- | --- |
| **Brazil** | | | | | |
| 1 | Parque Nacional de Furna Feia, Mossoró, Rio Grande do Norte | 5° 2’ 24” S | 37°33’36” W | UFMG 4716 | This study |
| 2 | Vila de Patamuté, Gruta de Patamuté, Curaçá, Bahia | 9°24’19” S | 39°28’13” W | CMARF 320, 321 | This study |
| 3 | Rio Branco, Fazenda Bela Vista, Ilhéus, Bahia | 14°47’18” S | 39°2’54” W | MZUSP 11613, 11614, 11615 | This study |
| 4 | UHE Jirau, Mutum-Paraná, Porto Velho, Rondônia | 9° 15’ 51.8” S | 64° 38’ 30.8” W | MZUSP 35753, 35754 | This study |
| 5 | Refúgio de Vida Silvestre Mata do Junco, Capela, Sergipe | 10°32′ S | 37°03′ W | ALP 9730, 9731, 9732 | Mikalauskas et al 2014 |
| 6 | Fazenda Santana, Japoatã, Sergipe | 10° 32' 7" S | 36° 45' 54” W | LBC 0112, 0113 | Pedroso et al. 2020 |
| 7 | Estação Experimental de Saltinho, Rio Formoso, Pernambuco | 8° 38’ S | 35° 9’ W | DZUFPE 410 | Guerra (2007) |
| 8 | Mata Dois Irmãos, Recife, Pernambuco | 8° 0’ 27” S | 34° 56’59” W | UFPE 888, 889 | Guerra (2007) |
| 9 | Refúgio Ecológico Charles Darwin, Igarassu, Pernambuco | 7° 49’ 51” S | 34° 53’ 58” W | UFPE 1338, 1339 | This study |
| 10 | Engenho Vicente Campelo, Usina Cucaú, Ribeirão, Pernambuco | 8° 4' 12" S | 35° 17' 24" W | UFPB 7468 | This study |
| 11 | Mata do Camocim (EECO do Tapacurá),  São Lourenço da Mata, Pernambuco | 8° 21' 0" S | 35° 45' 36" W | UFPE 1192 | This study |
| 12 | Reserva Biológica Guaribas (SEMA 3), Rio Tinto, Paraíba | 6° 48' 12” S | 35° 5' 1" W | UFPB 7312 | Feijó et al 2016 |
| 13 | Fazenda Pacatuba, Sapé, Paraíba | 7° 5' 58" S | 35° 12' 56" W | UFPB 1293, 1307, 1308, 1309, 8165*, 10717* | Feijó and Langguth 2011, *This study |
| 14 | Próximo a Reserva Biológica Guaribas, Mamanguape/Rio Tinto, Paraíba | 6° 43' 10" S | 35° 10' 46" W | UFPB 8932 | Feijó et al 2016 |
| 15 | Floresta Nacional de Nísia Floresta, Rio Grande do Norte | 6° 4' 48" S | 35° 10' 48"W | UFPE 3193 | Barros et al. 2017 |
| 16 | Juruena National Park, São João River trail, Mato Grosso | 8° 57' 0" S | 58° 32' 38" W | CMUFLA 1320 | Dalponte et al. 2016 |
| 17 | Alter do Chão, Santarém, Pará | 2° 24' 50" S | 54° 42' 36"W | INPA 2593,2594, 2596, 2597, 2598, 2588, 2600, 2601, 2602, 2603, 2604, 2605, 2606, 2607, 2608, 2609, 2610, 2660, 2661, 2662, 2663, 2664, 2665, 2666, 2667 | Bernard 2001 |
| 18 | Aramanaí, Rio Tapajós, Santarém, Pará | 2° 45' S | 55° 10' 48" W | AMNH 94473, 94474 | This study |
| 19 | Tamary, Rio Tapajós, Santarém, Pará | 3° 4' 28" S | 55° 6' W | AMNH 94481, 94482, 94483, 94484, 94485, 94486, 94489, 94490 | This study |
| 20 | Caxiricatuba, Rio Tapajós, Aveiro, Pará | 2° 49' 48" S | 55° 7' 48"W | AMNH 94492, 94493, 94495, 94496 | This study |
| 21 | Igarapé Brabo, Rio Tapajós, Pará | 2° 39' 36" S | 55° 9' 36" W | AMNH 94500, 94502 | This study |
| 22 | Porto Trombetas, Platô Bacaba, Oriximiná, Pará | 1° 46' 12" S | 56° 22' 12" W | VCT 1259 | This study |
| 23 | Porto Trombetas, Trilha na "23", Oriximiná, Pará | 1° 46' 48" S | 56° 21' 36" W | VCT 1323 | This study |
| 24 | Vila Jatuarana, Prainha, Pará | 1° 47' 58" S | 53° 28' 46" W | IEPA 1942 (PTX 34) | This study |
| 25 | Villarinho do Monte, Rio Xingu, Porto de Moz, Pará | 1° 36' 36" S | 52° 0' 36" W | AMNH 96122 | This study |
| 26 | Ilha do Taiuna, Rio Tocantins, Cametá, Pará | 2° 15' 0" S | 49° 27' 57" W | AMNH 97069, 97070, 97071, 97072, 97073, 97240 | This study |
| 27 | Cametá, Pará | 2° 15' S | 49° 9' W | ND | Sanborn (1937) |
| 28 | Belém, Pará | 1° 26' 58" S | 48° 29' 58" W | MZUSP 11536, 11537 | This study |
| 29 | Cachoeira do Arari, Marajó, Pará | 1° 0' 36" S | 48° 57' 36" W | MZUSP 6001 | This study |
| 30 | Cachoeira, Ilha do Marajó, Pará | 1° 0' 57" S | 48° 57' 57" W | ND | Vieira (1942) |
| 31 | Amapá | 1° 19' 22" N | 50° 17' 18" W | IEPA 1696 | da Silva et al. 2013 |
| 32 | APA Rio Curiaú, Macapá, Amapá | 0° 6' 36" S | 51° 4' 48" W | IEPA 1258 | This study |
| 33 | Biological Dynamics of Forest Fragments Project, Florestal reserve, Manaus, Amazonas | 2° 24' 57"S | 59° 45' 0" W | INPA 2504 | Sampaio et al. 2003 |
| 34 | Reserva Ducke, Manaus, Amazonas | 2° 36' 0" S | 59° 55' 12" W | NRR 160 | Reis and Peracchi 1987 |
| 35 | Amanã Sustainable Development Reserve | 2° 34' 57.5" S | 64° 40' 10' W | ND | Pereira et al. 2010 |
| 36 | Estação Experimental de Silvicultura Tropical INPA, SUFRAMA, Manaus, Amazonas | 3° 6' 0" S | 60° 1' 48" W | ZUEC 0757 | This study |
| 37 | Nova Olinda do Norte, Amazonas | 3° 49' 10"S | 59° 2' 36" W | UFMG 3546 | This study |
| 38 | Rio Eiru, Santo Antônio, Amazonas | 6° 42' 0" S | 69° 51' 57" W | FMNH 140789 | This study |
| **French Guiana** | | | | | |
| 39 | Paracou, Sinnamary, Cayenne | 5° 16' 30"N | 52° 55' 22"W | AMNH 266010, 266011*, 266012, 266013, 267087*, 267088, 267280, 267837, 267838, 267839, MNHN 1995.819, 1995.820, 1995.821, 1995.821 | Lim et al. 2010; Simmons and Voss 1998  *This study |
| 40 | Piste of Saint Elie, Sinnamary, Ultramar | 5° 18' 1” N | 53° 3' 59" W | ND | Brosset, A., and Charles-Dominique, P. (1990) |
| **Suriname** | | | | | |
| 41 | Zanderij | 5° 27' 1"N | 55° 11' 58" | ND | Genoways et al 1981 |
| **Guyana** | | | | | |
| 42 | Ceiba Biological Center, Demerara-Mahaica | 6° 30' 0" N | 58° 12' 57"W | ROM 112530, 112531*, 113611*, 113612* | Lim et al. 2010  *This study |
| 43 | Iwokrama Forest Field Station, Potaro-Siparuni | 4° 40' 12" N | 58° 51' 0" W | ROM 107458 | Lim et al. 2010; This study |
| 44 | Illiwa River, Upper Essequibo-Upper Takutu | 2° 39' 36" N | 58° 39' 36" W | ROM 41530 | Lim et al. 2010; This study |
| 45 | Bada Creek, Upper Demerara-Berbice | 5° 34' 58" N | 58° 7' 58" W | ROM 70688 | Lim et al. 2010 |
| **Venezuela** | | | | | |
| 46 | Rio Casiquiare, Buena Vista, Rio Negro, Amazonas | 2°54′ N | 66°2′ W | AMNH 78419 | GBIF; This study |
| **Colombia** | | | | | |
| 47 | Hitoma Community, Leticia, Amazonas | 4°7'55"S | 69°54'57"W | YMS 708, 709, 711 | Rodríguez-Posada et al 2021 |
| 48 | Vereda La Ventrosa, finca El Jordán, San Luis de Palenque, Casanare | 5° 12' 14" N | 71° W | FSC 107, 193 | Suares-Castro et al. 2012 |
| 49 | Campamento Chamusa, Rio Duda, Serranía de la Macarena, Meta | 2° 24' N | 74° 9 36" W | IAvH 2241 | Lemke et al. 1982 |
| 50 | La Bendición Farm, Vichada | 6°4'4"N | 69°10'30" W | ICN 24290, 24291 | Rodríguez-Posada et al 2021 |
| 51 | Campo Rubiales, bloque Kifa Este, Puerto Gaitán, Meta | 3°49' 48" N | 71° W | HERC 768, 769 | Suares-Castro et al. 2012 |
| **Ecuador** | | | | | |
| 52 | Cuyabeno Faunistic Reserve, Palma Roja, Sucumbíos | 0° 1' 6" S | 76° 9' 56" W | QCAZ 8478 | McDonough et al. 2010 |
| 53 | Setor de Tivacuno, Orellana, Amazonas | 0° 41' 56" S | 76° 23' 6" W | MEPN 9869 | McDonough et al. 2010 |
| 54 | Bosque del Aguarico | 0° 2' 51" N | 77° 19' 44" W | MEPN 9913 | Arcos et al. 2007 |
| 55 | Tiputini Biodiversity Station | 0° 38' 18" S | 76° 8' 52" W | ND | Rex et al. 2008 |
| **Peru** | | | | | |
| 56 | Rio Galvez, Nuevo San Juan, Loreto | 5° 14' 24" S | 73° 9' 36" W | AMNH 273182, 273197*, MUSM 15247, 15251 | Lim et al. 2010; *This study |
| 57 | Quebrada Esperanza, Mariscal Ramón Castilla, Loreto | 4° 19' 58" S | 71° 55' W | FMNH 89103, 89104 | Graham-Angeles et al 2021 |
| 58 | Explonapo Camp, Mazán, Maynas, Loreto | 3° 15' 25" S | 72° 55' 1" W | MUSM 6744, 20973 | Graham-Angeles et al 2021 |
| 59 | Quebrada Água Negra, Alto Nanay, Maynas, Loreto | 2° 51' 14" S | 74° 58' 42" W | MUSM 24412 | Graham-Angeles et al 2021 |
| 60 | San Lucas, Maynas, Loreto | 4° 6' S | 73° 27' 36" W | CML 13317 | Díaz et al. 2019 |
| 61 | Tahuayo Farm, Fernando Lores, Loreto | 4° 20’ S | 73° 13’ W | ND | Velazco et al. 2021 |
| 62 | Arboretum/Zungarochocha, San Juan Bautista, Maynas, Loreto | 3° 49' 58" S | 73° 22' 22" W | MUSM 30852, 30853 | Graham-Angeles et al 2021 |
| 63 | Mishana río Nanay, San Juan Bautista, Maynas, Loreto | 3° 58' 48" S | 73° 30' 3.6"W | MUSM 30862 | Graham-Angeles et al 2021 |
| 64 | El Paujil, San Juan Bautista, Maynas, Loreto | 3° 59' 42" S | 73° 26' 45"W | MUSM 27144, 27145, 27146, 27147 | Graham-Angeles et al 2021 |
| 65 | San Juan Bautista, Maynas, Loreto | 4° 9' 0"S | 73° 28' 1"W | MUSM 30855, 30856, 30857, 30858 | Graham-Angeles et al 2021 |
| 66 | San Juan Bautista, Maynas, Loreto | 4° 11' 13” S | 73° 28' 4” W | MUSM 30859, 30860, 30861 | Graham-Angeles et al 2021 |
| 67 | San Juan Bautista, Maynas, Loreto | 4° 15' 21" S | 73° 29' 6" W | MUSM 30854 | Graham-Angeles et al 2021 |
| 68 | San Lucas W km 43 de la carretera Iquitos-Nauta, Maynas, Loreto | 4° 6' 14" S | 73° 27' 46" W | MMD 4271, 4272 | Diaz et al. 2012 |
| 69 | Nauta, Loreto | 4° 15' 18" S | 73° 51' 54" W | ND | Rengifo et al. 2013 |
| 70 | Km 43 on Iquitos–Nauta Hwy, San Lucas, Loreto | 4° 6' 21" S | 73° 28' 15" W | ND | Gaudioso et al. 2020 |
| 71 | Ucayali, Tushemo | 9°49′ S | 73°5′ W | ND | Thomas (1924) |
| 72 | Madre de Dios | 13°30′ S | 71°58′ W | ND | Solari et al. 2006 |
| 73 | Vivero Forestal y Fundo "El Bosque", Las Piedras, Madre de Dios | 12°14'14” S | 69° 16' 38" W | MUSM 48966 | Sanchez, M.K.R 2020 |
| **Bolivia** | | | | | |
| 74 | Refugio de Vida Silvestre "Espíritu", Beni | 14° 13' 0" S | 66° 24' W | CBF 6322 | Poma-Urey et al. 2021 |
| 75 | Versalles, Beni | 12° 43' 58" S | 66° 9' 57" W | AMNH 209228 | Poma-Urey et al. 2021 |
| 76 | Reserva Nacional Amazónica Manuripi-Heath, San Miguel, Pando | 11° 30' 36"S | 67° 39' 36" W | CBF 1414, 1417, 1427 | Poma-Urey et al. 2021 |

**References**

Arcos, R., Albuja, L., and Moreno, P. (2007). Nuevos registros y ampliación del rango de distribución de algunos mamíferos del Ecuador. Rev. Politécnica (Serie Biología) 7: 4.

Barros, M.A., Morais, C.M.G., Figueiredo, B.M.B., Moura Júnior, G.B.D., Ribeiro, F.F.D.S., Pessoa, D.M.A., Ito, F. and Bernard, E. (2017). Bats (Mammalia, Chiroptera) from the Nísia Floresta National Forest, with new records for the state of Rio Grande do Norte, northeastern Brazil. Biota Neotrop. 17: e20170351.

Bernard, E. (2001). Species list of bats (Mammalia, Chiroptera) of Santarém area, Pará state, Brazil. Rev. Bras. Zoo. 18: 455-463.

Bernard, E., Albernaz, A.L., and Magnusson, W.E. (2001). Bat species composition in three localities in the Amazon Basin. Stud. Neotrop. Fauna Environ. 36: 177-184.

Brosset, A. and Charles-Dominique, P. (1990). The bats from French Guiana: a taxonomic, faunistic and ecological approach. Mammalia 54: 509-560.

Dalponte, J.C., Gregorin, R., Esteves-Costa, V.A., Rocha, E.C., and Marcelino, R. (2016). Bat survey of the lower Juruena River and five new records for the state of Mato Grosso, Brazil. Acta Amazonica 46: 227-232.

da Silva, C.R., Martins, A.C.M., de Castro, I.J., Bernard, E., Cardoso, E.M., dos Santos Lima, D., Gregorin, R., Rossi, R., Percequillo. A., and da Cruz Castro, K. (2013). Mammals of Amapá State, Eastern Brazilian Amazonia: a revised taxonomic list with comments on species distributions. Mammalia, 77: 409-424.

Díaz, M.M., Romero, N.M., Ramos Barreira, M.D.M., Morales Soler, J.J., and Barquez, R.M. (2019). *Peropteryx macrotis* (Wagner, 1843) (Mammalia, Chiroptera, Emballonuridae), a newly recorded family, genus, and species of bat for Argentina. Check List 15: 945-949.

Feijó, J.A. and Langguth, A. (2011). Lista de Quirópteros da Paraíba, Brasil com 25 novos registros. Chirop. Neotrop. 17: 1055-1062.

Feijó, J.A., Nunes, H., and Langguth, A. (2016). Mamíferos da Reserva Biológica Guaribas, Paraíba, Brasil. Rev. Nordes. Bio. 24: 57-74.

Gaudioso, P.J., Martínez, J.J., Barquez, R.M., and Díaz, M.M. (2020). Evolution of scapula shape in several families of bats (Chiroptera, Mammalia). J. Zool. Systematics and Evolutionary Research 58: 1374-1394.

GBIF Annual Report. 2012. Global Biodiversity Information Facility.

Genoways, H.H., Williams, S.L., and Groen, J.A. (1981). Results of the Alcoa Foundation-Suriname expeditions. V. Noteworthy records of Surinamese mammals. Annals of Carnegie Mus. 50: 319-332.

Graham-Angeles, L., Sánchez-Vendizú, P., Diaz, S., and Pacheco, V. (2021). Diversidad y conservación de los murciélagos de Loreto, Perú. Rev. Peruana Bio. 28: e21917-e21917.

Guerra, D.Q. (2007). *Chiroptera de Pernambuco: distribuição e aspectos biológicos* (Master's thesis, Universidade Federal de Pernambuco).

Lemke, T.O., Cadena, A., Pine, R.H., and Hernández-Camacho, J. (1982). Notes on opossums, bats, and rodents new to the fauna of Colombia.

Lim, B.K., Engstrom, M.D., Reid, F.A., Simmons, N.B., Voss, R.S., and Fleck, D.W. (2010). A new species of *Peropteryx* (Chiroptera: Emballonuridae) from western Amazonia with comments on phylogenetic relationships within the genus. Am. Mus. Nov. 2010: 1-20.

Mcdonough, M.M., Lim, B.K., Ferguson, A.W., Brown, C.M., Burneo, S.F., and Ammerman, L.K. (2011). Mammalia, Chiroptera, Emballonuridae, *Peropteryx leucoptera* Peters, 1867 and *Peropteryx pallidoptera* Lim, Engstrom, Reid, Simmons, Voss and Fleck, 2010: Distributional range extensions in Ecuador. Check List 6: 639-643

Mikalauskas, J.S., da Rocha, P.A., Dias, D., and Peracchi, A.L. (2014). Update on the distribution of *Peropteryx leucoptera* Peters, 1867 (Mammalia, Chiroptera, Emballonuridae): first record for the state of Sergipe, northeastern Brazil. Check List 10: 402–406.

Reis, N.R. and Peracchi, A.L. (1987). Quirópteros da região de Manaus, Amazonas, Brasil (Mammalia, Chiroptera). Bol. Mus. Paraense Emílio Goeldi, Série Zoologia 39: 161–182.

Rengifo, E.M., Calderón, W., and Aquino, R. (2013). Características de refugios de algunas especies de murciélagos en la cuenca alta del rio Itaya, Loreto, Perú. Cuadernos de Investigación UNED 5: 143-150.

Rex, K., Kelm, D.H., Wiesner, K., Kunz, T.H., and Voigt, C.C. (2008). Species richness and structure of three Neotropical bat assemblages. Biol. J. Linn. Soc. 94: 617-629.

Rodríguez-Posada, M.E., Fernández-Rodríguez, C., and Sandoval, P. (2021). Northern distributional extensions of *Peropteryx leucoptera* and *Peropteryx pallidoptera* (Chiroptera: Emballonuridae) from Vichada, Colombia. Mammalogy Notes 7: 192-192.

Pedroso, M.A., Pereira, A.S., Oliveira, H.S., Souza, J.W.S., Caldas, F.L.S., Beltrão-Mendes, R., Ruiz-Esparza, J., Rocha, P.A., and Ferrari, S.F. (2020). Rapid survey of bats (Chiroptera) in the Atlantic Forest in eastern Sergipe, Brazil: unexpected diversity in a fragmented landscape. Neotrop. Bio. Conserv. 15: 317-331.

Pereira, M.J., Marques, J.T. and Palmeirim, J.M. (2010). Vertical stratification of bat assemblages in flooded and unflooded Amazonian forests. Current Zool. 56: 469–478.

Poma-Urey, J.L., Acosta, L.H., Ingala, M.R., Revollo, S.G., Meza, M.A., Gutiérrez-Cruz, S., Zabala-Pedraza, J.C., Peñaranda, M., and Salazar-Bravo, J. (2021). Nueva especie de *Peropteryx* (Chiroptera: Emballonuridae) para Bolivia. Notas Mam. Sudam. 3: e321.

Sanborn, C.C. (1937). American bats of the subfamily Emballonuridae. Field Mus. Nat. Hist., Zool. Ser. 20: 321-354.

Sanchez, M.K.R. (2020). Diversidad alfa de murciélagos en el vivero forestal y fundo El Bosque-Madre de Dios, Perú. (Master’s thesis, Universidade Federal de Piura)

Sampaio, E.M., Kalko, E.K.V., Bernard, E., Rodríguez-Herrera, B., and Handley, C.O. (2003). A biodiversity assessment of bats (Chiroptera) in a tropical lowland rainforest of Central Amazonia, including methodological and conservation considerations. Stud. Neotrop. Fauna Environ. 38: 17-31.

Simmons, N.B. and Voss, R.S. (1998). The mammals of Paracou, French Guiana, a Neotropical lowland rainforest fauna. Part 1, Bats. Bulletin of the American Museum of Natural History 237: 1-219.

Solari, S., Pacheco, V., Luma, L., Velazco, P.M., and Patterson B.D. (2006) Mammals and birds of the Manu biosphere reserve, Peru. *Fieldiana Zoology*, *110*, 1-49.

Suarez-Castro, A.F., Ramírez-Chaves, H.E., Rodríguez-Posada, M.E., and García, J. (2012). Nuevo registros de Peropteryx leucoptera y primer registro de Peropteryx pallidoptera (Chiroptera-Emballonuridae) para Colombia. Mastozool. neotrop., 19: 165-171.

Thomas, O. (1924). LX.—On a collection of mammals made by Mr. Latham Rutter in the Peruvian Amazons. J. Nat. Hist. 13: 530-538.

Velazco, P.M., Voss, R.S., Fleck, D.W., and Simmons, N.B. (2021). Mammalian Diversity and Matses Ethnomammalogy in Amazonian Peru. Part 4: Bats. Bulletin of the American Museum of Natural History 451: 1-200.

Vieira, C.O.C (1942). Ensaio monográfico sobre os quirópteros do Brasil. Arq. Zool*.* *3*, 219-472.
